# Supplementary material
Source: PubMed Central journal article supplement (PMC9971020)
Supplement: 41541_2023_599_MOESM1_ESM.pdf [file 41541_2023_599_MOESM1_ESM.pdf]

1 **Supplemental material**

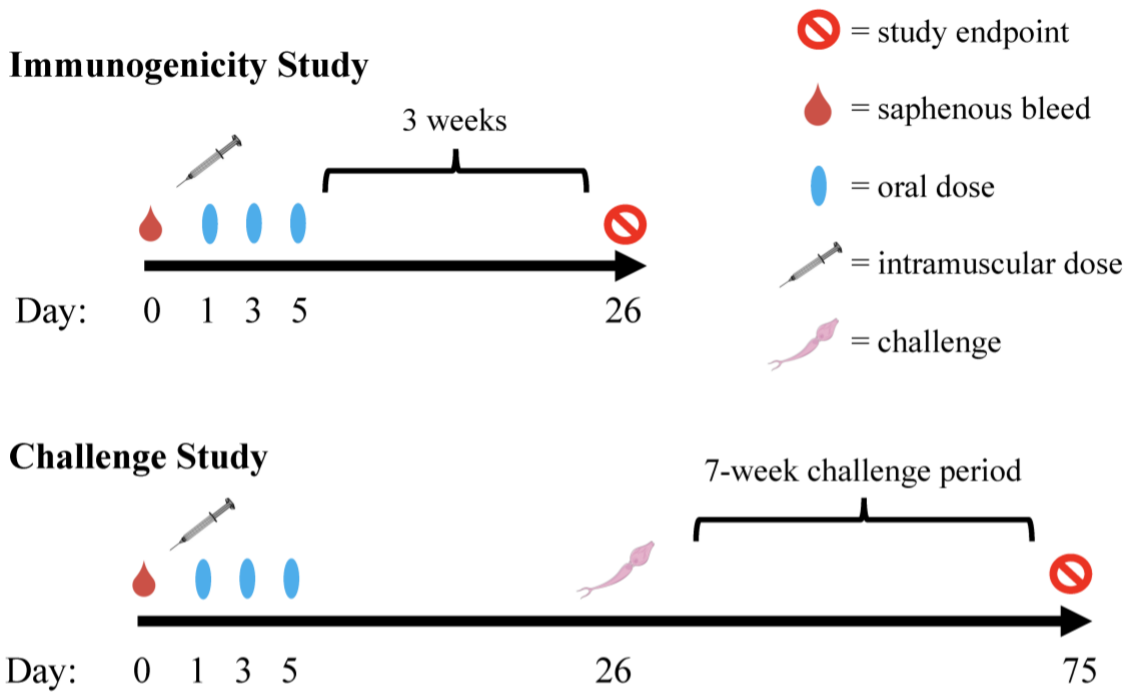

| Vaccine Group | Oral Dose   | Intramuscular Dose |
|---------------|-------------|--------------------|
| PBS           | PBS         | PBS                |
| WT + rCatB    | WT YS1646   | rCatB              |
| NHC           | YS1646::NHC | PBS                |
| NHC + rCatB   | YS1646::NHC | rCatB              |

2  
 3 **Supplemental Figure 1. Study Design.** Baseline serum was collected on D0 for all mice.  
 4 Depending on the experimental group, mice received three oral doses of PBS, WT YS1646 or  
 5 YS1646::NHC on D1, D3, and D5 (200 μL, 1 x 10<sup>9</sup> CFU/dose). Mice also received an  
 6 intramuscular dose of PBS or rCatB (50 μL, 20 μg/dose). Mice were then euthanized three weeks  
 7 post-vaccination for immunogenicity studies. For challenge studies, mice were percutaneously  
 8 exposed to 150 cercaria and euthanized 7 weeks later to assess parasite burden.

9  
 10

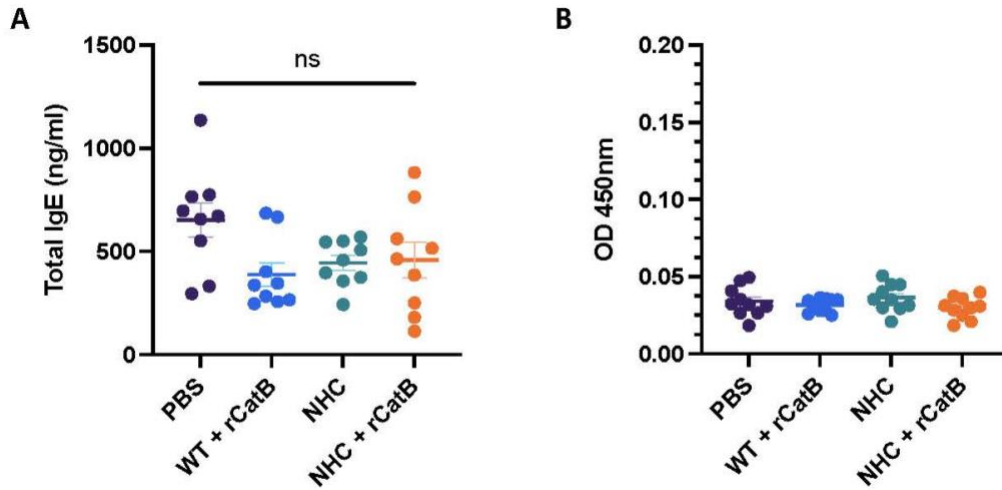

11  
 12 **Supplemental Figure 2. Total and antigen-specific IgE.** Serum samples were collected 3 weeks  
 13 post-vaccination. Total serum IgE (A) and antigen-specific IgE (B) in response to vaccination.  
 14 Each independent experiment consisted of 5 animals per group. Each experiment was performed  
 15 twice.

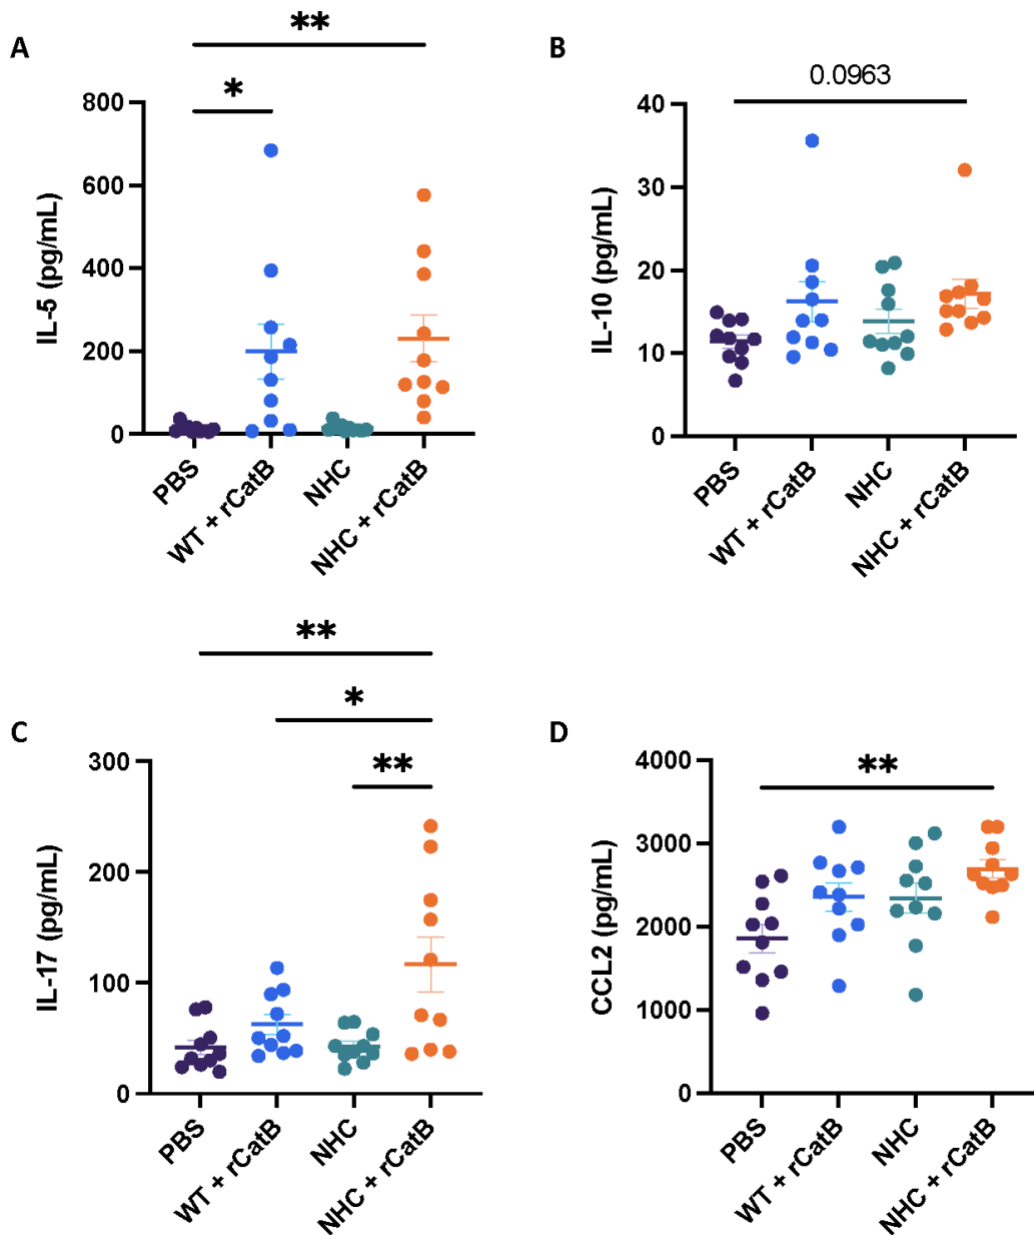

16  
 17 **Supplemental Figure 3. Other cytokines and chemokines.** Supernatant levels of IL-5 (A), IL-  
 18 10 (B), IL-17 (C), and CCL2 (D) after *ex vivo* restimulation of splenocytes with rCatB for 72 hours.  
 19 Cytokines were measured by Quansys multiplex ELISA and expressed in pg/mL. Each  
 20 independent experiment consisted of 5 animals per group. Each experiment was performed twice.  
 21 Data are shown as mean  $\pm$  SEM. Statistical significance was determined by one-way ANOVA  
 22 with Tukey's multiple comparisons (\* $P < 0.05$ , \*\* $P < 0.01$ ).

23

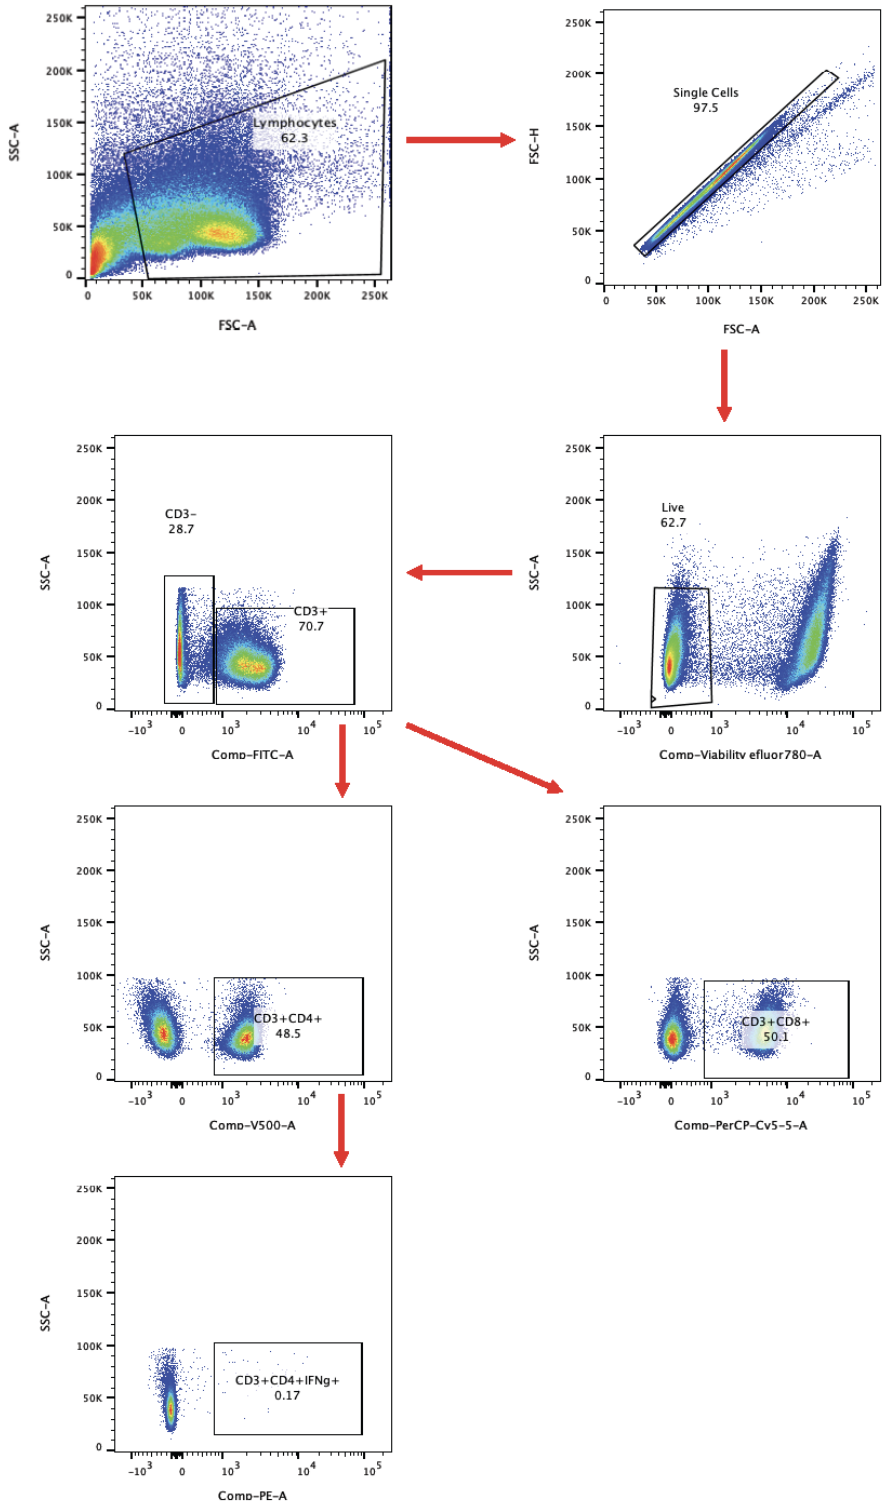

24

25 **Supplemental Figure 4. Flow cytometry gating strategy.** To identify CD4<sup>+</sup> and CD8<sup>+</sup> T cells  
 26 expressing IFN $\gamma$ , we first gated to exclude debris, cell clusters, and dead cells. After gating for  
 27 single cells and live cells, T cell subsets were identified from the CD3<sup>+</sup> population and IFN $\gamma$ <sup>+</sup> cells  
 28 were identified in each population.

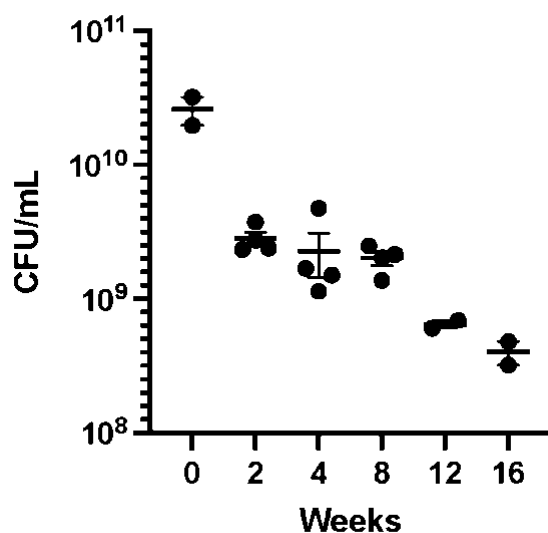

29  
 30 **Supplemental Figure 5. Viability of lyophilized NHC over time.** Recombinant YS1646 strains  
 31 were freeze-dried and stored at room temperature (RT) for 16 weeks. Samples were resuspended  
 32 and grown on LB plates to assess CFU counts and calculate concentrations. The y-axis is expressed  
 33 on a log scale. Each time point consisted of either 2 or 4 samples.

34  
 35  
 36  
 37

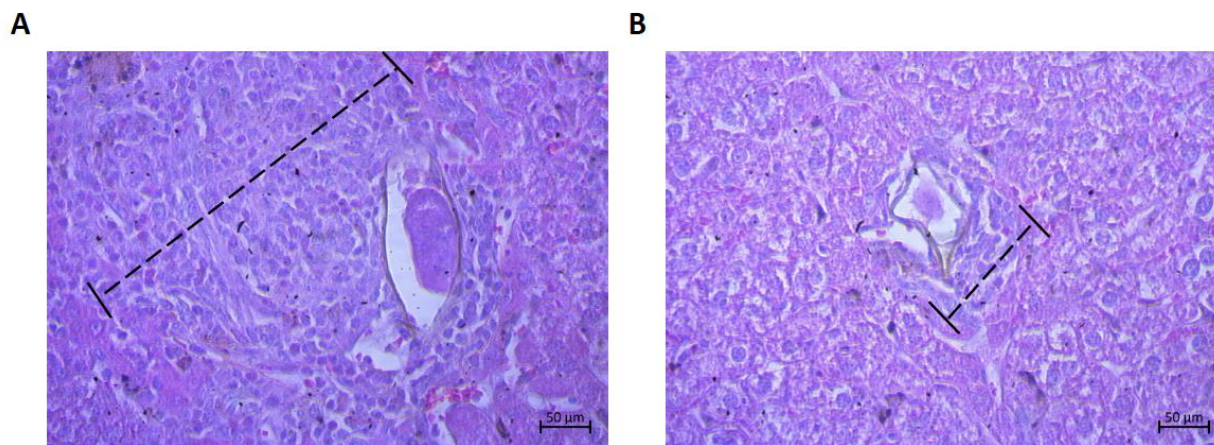

38  
 39 **Supplemental Figure 6. Histopathological staining of hepatic sections.** Representative images  
 40 of H&E staining of liver egg granulomas in control mice (A) and the multimodal vaccination group  
 41 (B). Scale is set to 50 μm.

42  
 43  
 44

45 **Supplemental Table 1. Parasitic Burden.**

| <b>Vaccine Group</b> | <b>Worm Count</b>          | <b>% Female Worms</b>      | <b>Hepatic Egg Count</b>      | <b>Intestinal Egg Count</b>   |
|----------------------|----------------------------|----------------------------|-------------------------------|-------------------------------|
| PBS                  | 51.4 ± 2.2                 | 51.3 ± 1.5                 | 15,974 ± 984.7                | 12,766 ± 804.3                |
| WT + rCatB           | 38.7 ± 3.8                 | 49.8 ± 1.3                 | 14,041 ± 259.5                | 10,331 ± 547.4                |
| NHC                  | 24.8 ± 2.0                 | 38.8 ± 2.4 <sup>***</sup>  | 7,292 ± 658.2                 | 6,185 ± 353.9                 |
| NHC + rCatB          | 10.1 ± 0.7 <sup>****</sup> | 32.6 ± 1.9 <sup>****</sup> | 3,965 ± 259.5 <sup>****</sup> | 2,796 ± 250.5 <sup>****</sup> |

46 Summary of parasitic burden for each study group. Each experiment was performed twice. Data  
 47 are shown as mean ± SEM. Statistical significance was determined by one-way ANOVA with  
 48 Tukey's multiple comparisons (<sup>\*\*\*</sup> $P < 0.001$ , <sup>\*\*\*\*</sup> $P < 0.0001$  compared to the PBS group).

49
